# Supplementary material for: Bioinspired immuno-radio-enhancers toward synergistic nanomedicine through radiation-induced abscopal effects and immunocheckpoint blockade therapies
Source: Royal Society of Chemistry journal article supplement (doi:10.1039/d3bm01144e), 2023-01-01

Co-immunoprecipitation to examine whether the aPD-L1-displaying membrane were coated onto the MnO<sub>2</sub> NP cores.

NP-CpG@

M-aPD-L1 Pellets Supernatants Negative control

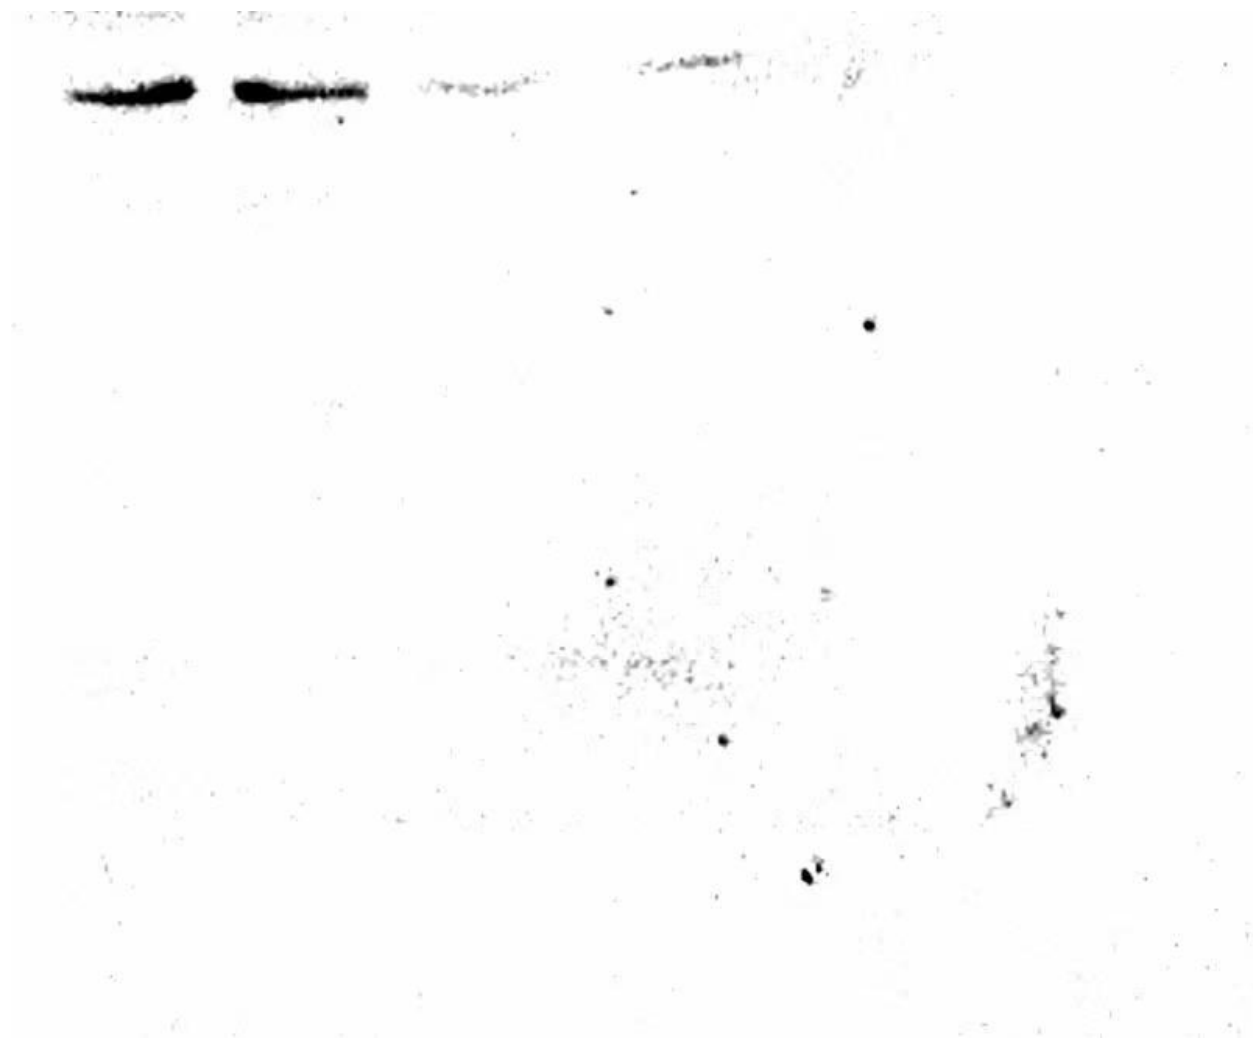

Supplement: d3bm01144e1.pdf [file d3bm01144e1.pdf]
