# Supplementary material for: Bioinspired immuno-radio-enhancers toward synergistic nanomedicine through radiation-induced abscopal effects and immunocheckpoint blockade therapies
Source: Royal Society of Chemistry journal article supplement (doi:10.1039/d3bm01144e), 2023-01-01
Supplement: d3bm01144e2.pdf [file d3bm01144e2.pdf]

## Supporting Information

### Bioinspired immuno-radio-enhancers toward synergistic nanomedicine through radiation-induced abscopal effects and immuncheckpoint blockade therapies

Pengfei Zhang<sup>1,2</sup>, Hu Chen<sup>1,2</sup>, Chuan Chen<sup>1</sup>, Xuan Liu<sup>1</sup>, Hongwei Cheng<sup>3,4</sup>, Yaming Wu<sup>1</sup>,  
Xiaoyong Wang<sup>3,4</sup>, Gang Liu<sup>\*3</sup>, and Yun Zeng<sup>\*1</sup>

<sup>1</sup> Department of Pharmacy, Xiamen Medical College, Xiamen 361023, China.

<sup>2</sup> Institute of Molecular Immunology, School of Laboratory Medicine and Biotechnology, Southern Medical University, Guangzhou, 510000, China.

<sup>3</sup> State Key Laboratory of Vaccines for Infectious Diseases, Center for Molecular Imaging and Translational Medicine, Xiang An Biomedicine Laboratory, National Innovation Platform for Industry-Education Integration in Vaccine Research, School of Public Health, Xiamen University, Xiamen 361002, China.

<sup>4</sup> Innovation Laboratory for Sciences and Technologies of Energy Materials of Fujian Province (IKKEM) & Amoy Hopeful Biotechnology Co., Ltd., Xiamen 361027, China.

\*Gang Liu (email: gangliu.cmitm@xmu.edu.cn); Yun Zeng (zengyun163@163.com).

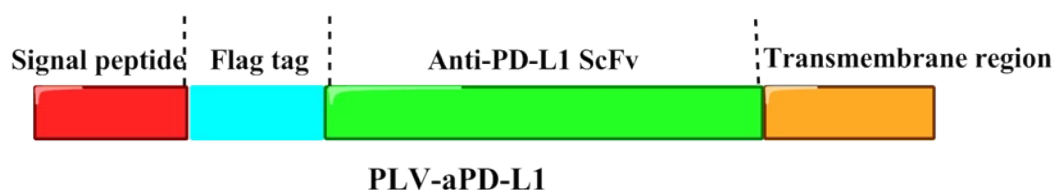

**Figure S1.** Schematic illustration of recombinant PLV-aPD-L1 gene fragments that were

subcloned into lentiviral PLV plasmids to express membrane-anchored anti-PD-L1 antibodies on the surface of MSCs.

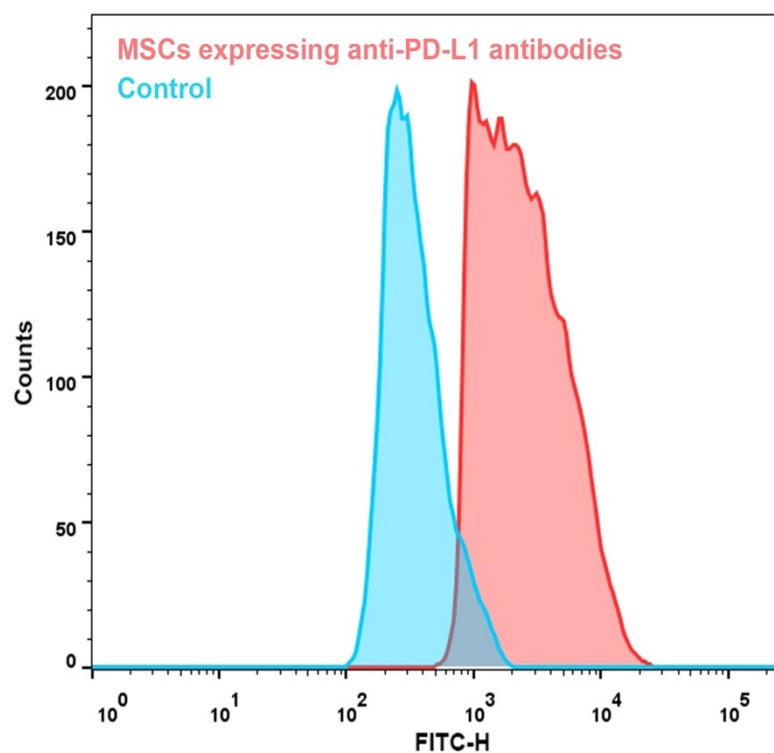

**Figure S2.** It was shown that about 92 % of MSCs expressed anti-PD-L1 ScFv (antibodies) on cellular surfaces using anti-flag antibodies through flow cytometry analysis.

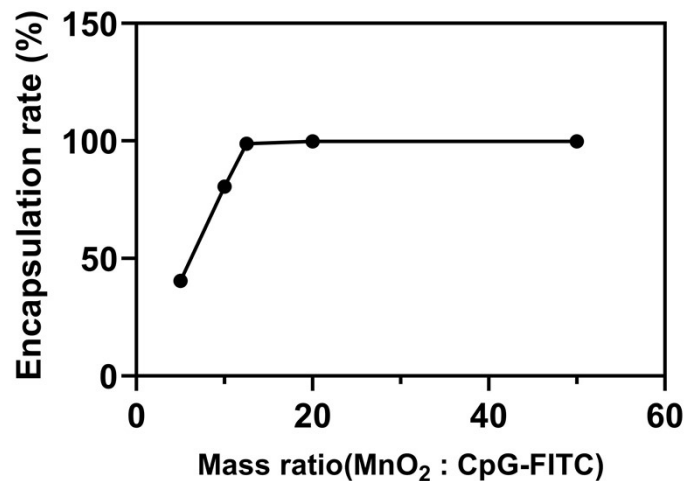

**Figure S3.** When mass ratios of MnO<sub>2</sub> NPs and CpG-FITC reached 12.5, the encapsulation rate of CpG approximated 100 %.

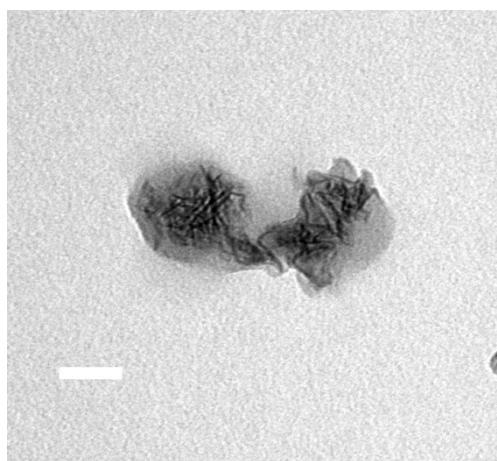

**Figure S4.** The enlarged TEM images of MnO<sub>2</sub> NP-CpG@M-aPD-L1 from Figure 1b revealed that the thickness of cell membrane coated onto the MnO<sub>2</sub> NPs indeed ranged from 10 to 20 nm (Scale bar: 50 nm).

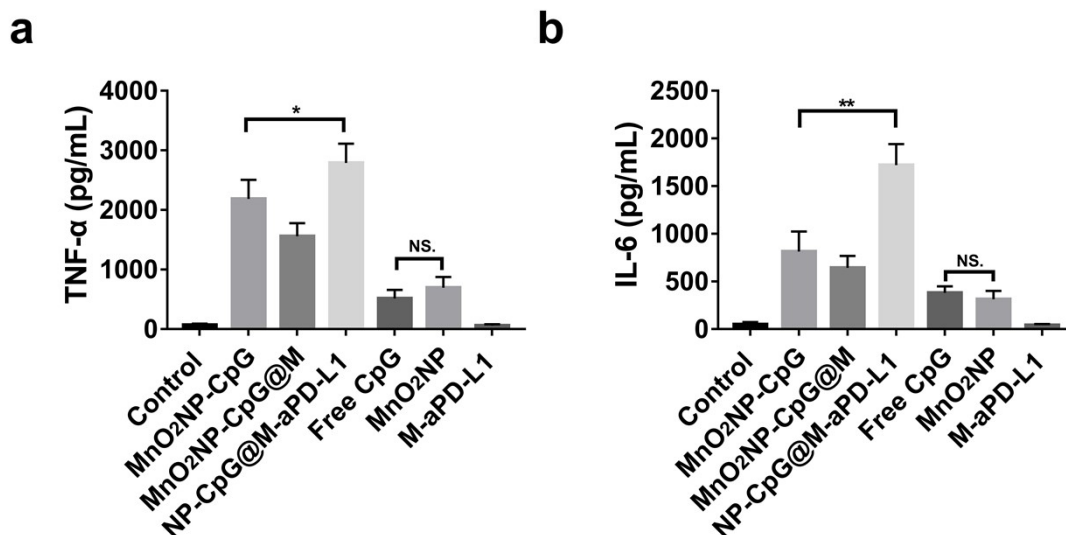

**Figure S5.** Targeted NPs-CpG@M-aPD-L1 (containing equivalent  $1.2 \mu\text{g mL}^{-1}$  CpG adjuvants or  $10 \mu\text{g mL}^{-1}$  of Mn contents) significantly increased the secretion levels of TNF- $\alpha$  and IL-6 cytokines from murine macrophages when compared to other control groups, as measured by ELISA kits.

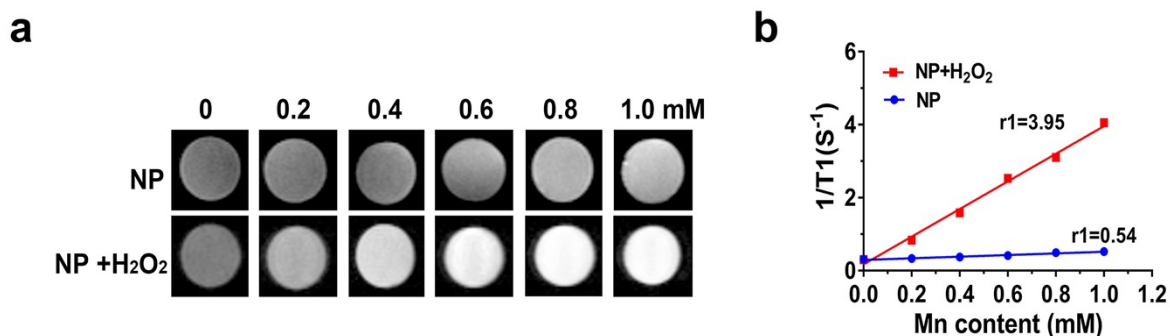

**Figure S6.** a) *In vitro*  $T_1$ -weighted MR imaging and b) R1 proton relaxivity ( $1/T_1$ ) of NPs-CpG@M-aPD-L1 containing different contents of Mn element were scanned with or without H<sub>2</sub>O<sub>2</sub> treatment (1.5 mM) using a micro MR imaging equipment.

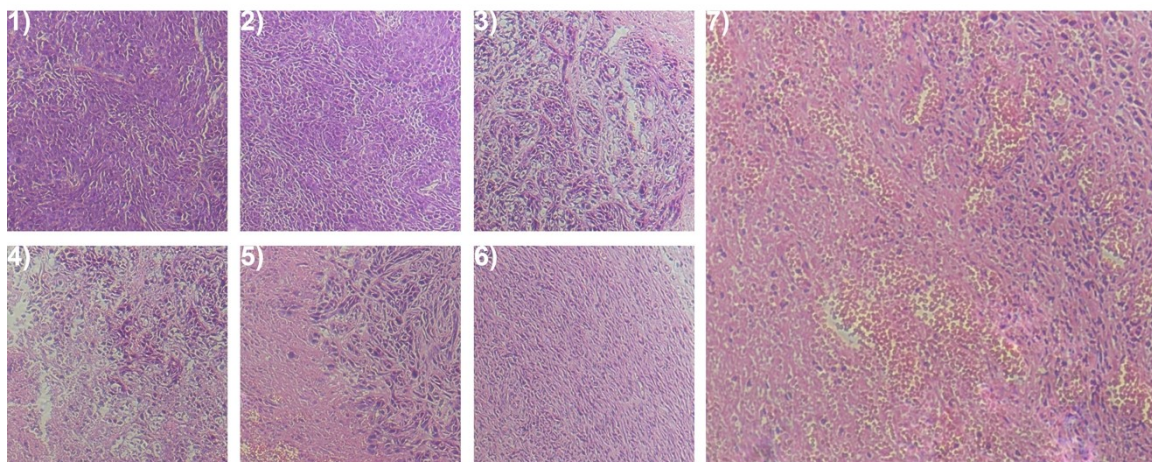

**Figure S7.** Hematoxylin and eosin (H&E) staining images of irradiated primary Hepa 1-6 tumors from mice with different treatments. 1) Control, 2) NP-CpG@M-aPD-L1, 3) RT, 4) RT+NP-CpG@M, 5) RT+NP@M-aPD-L1, 6) RT+M-aPD-L1 (membrane vesicles displaying aPD-L1), and 7) RT+NP-CpG@M-aPD-L1.

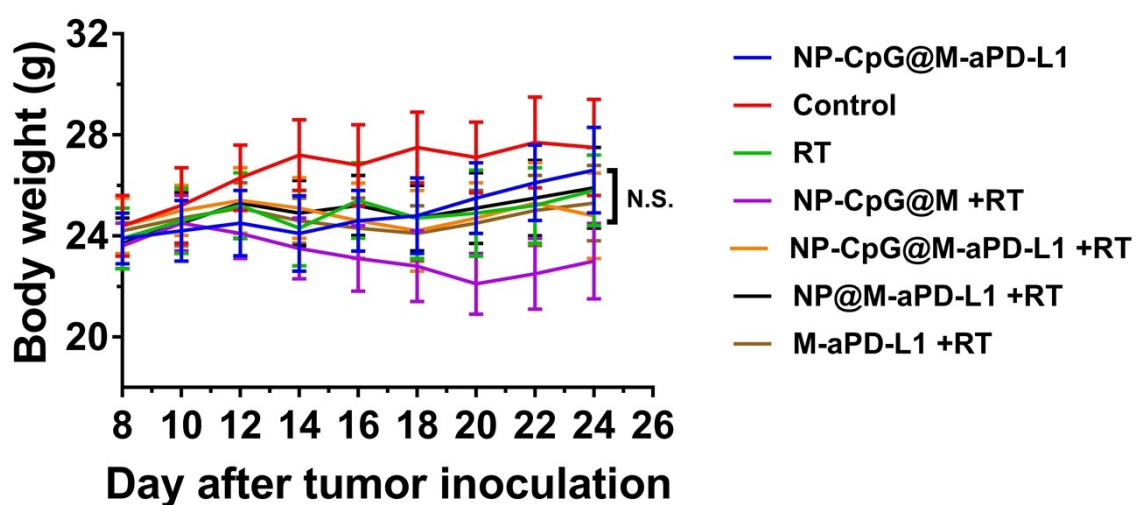

**Figure S8.** Body weight curves of mice with different RT treatments after intravenous injection of NP-CpG@M-aPD-L1, NP-CpG@M, NP@M-aPD-L1, or M-aPD-L1 (membrane vesicles displaying aPD-L1).

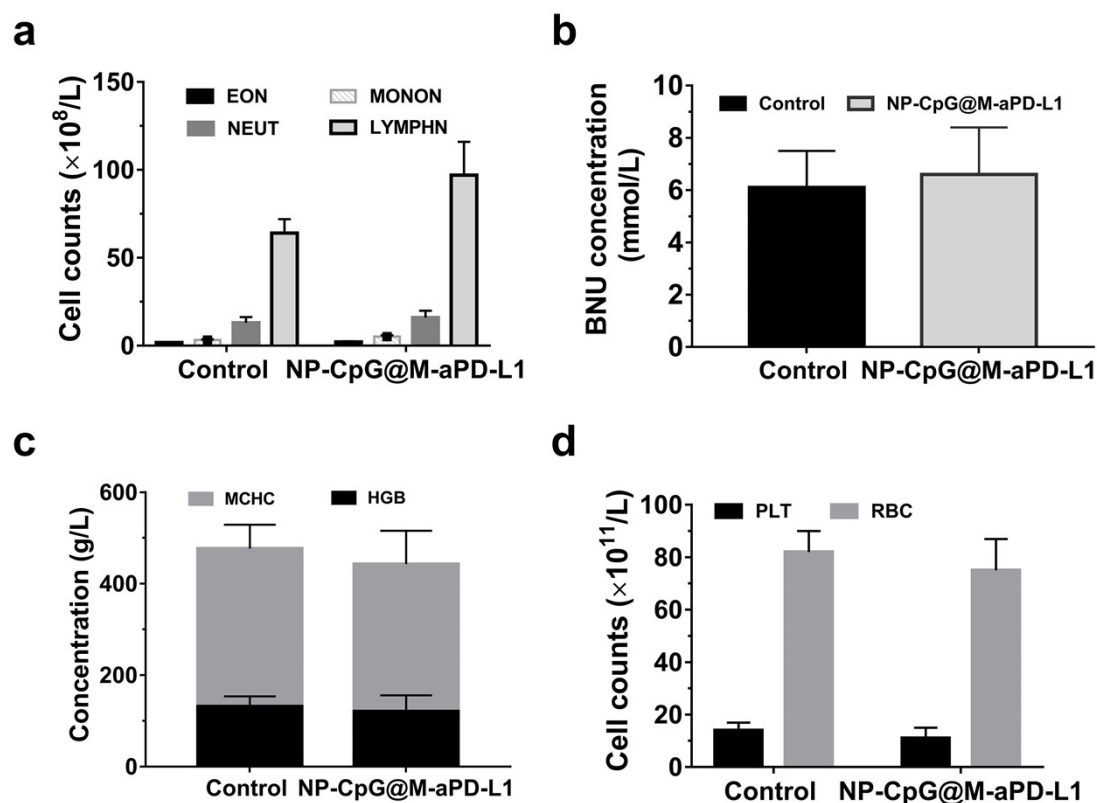

**Figure S9.** Blood biochemical tests of the mice 7 day after the last treatment with PBS or NP-CpG@M-aPD-L1 plus RT. (MONON: Mononuclear macrophages, EON: Eosinophils, NEUT: Neutrophile granulocyte, LYMPHN: Lymphocyte, BNU: Urine nitrogen content, MCHC: Mean corpuscular haemoglobin concentration, PLT: blood platelet, HGB: Hemoglobin, RBC red blood cell)

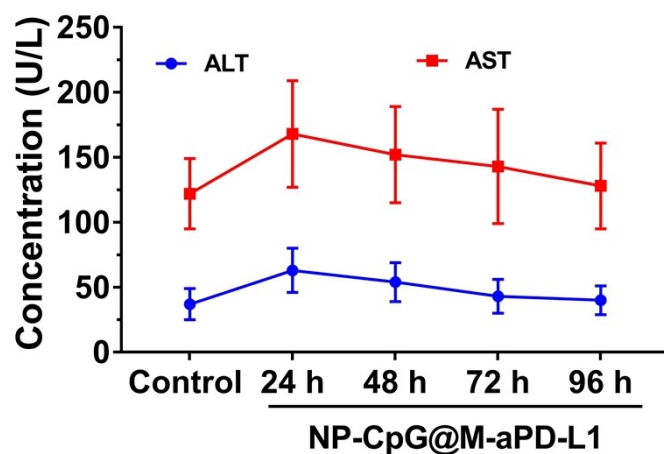

**Figure S10.** Liver functions after a single *i.v.* injection of NP-CpG@M-aPD-L1 were further examined by measuring the activities of alanine aminotransferase (ALT) and aspartate aminotransferase (AST) from mouse serum at predetermined time.

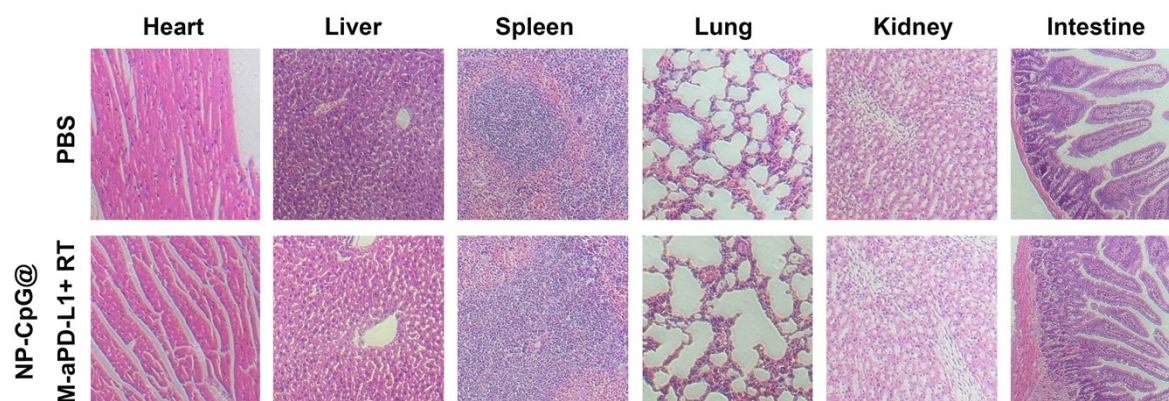

**Figure S11.** Hematoxylin and eosin (H&E) staining images of major organs from the mice after the last treatment with PBS or NP-CpG@M-aPD-L1 plus RT. There was no significant damage seen in these H&E images.

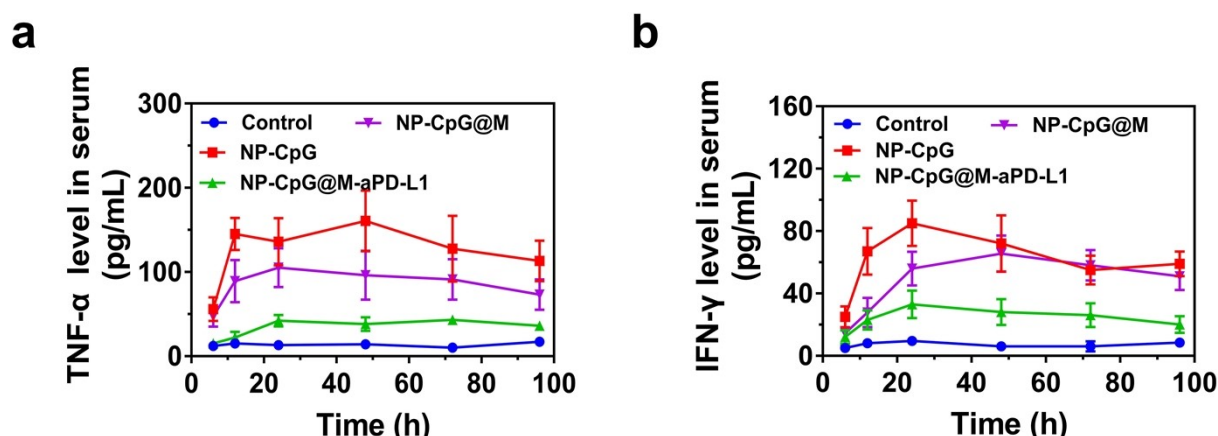

**Figure S12.** Serum TNF- $\alpha$  and IFN cytokine profiles at different time points after a single *i.v.* injection of NP-CpG@M-aPD-L1, NP-CpG, NP-CpG@M, or PBS. These results showed that tumor-targeting NP-CpG@M-aPD-L1 increased fewest levels of serum cytokines, when compared to other treatment groups.
